# Supplementary material for: GenomeFISH: genome-based fluorescence in situ hybridisation for strain-level visualisation of microbial communities
Source: Research Square preprint supplement (doi:10.21203/rs.3.rs-5531216/v1), 2024-12-17
Supplement: Supplementary file 3 [file a0065aea5fafb191eb0ef5e7.xlsx]

## Sheet: Sheet1
Microorganism	Fluorophore	BDR
Isolates
Escherichia coli CFT073	A546 A594 A647	71.7 85.7 56.8
Escherichia coli EDL933	A546 A594 A647	49.8 38.4 69.4
Escherichia coli C43	A647	67.2
Escherichia coli UQ950	A546	121.2
Escherichia fergusonii	A594	57.2
Klebsiella aerogenes	A594	35.5
Pseudomonas aeruginosa	A594	43.5
Megamonas funiformis	A546	85.1
Bacillus subtilis	A594	75.7
Agathobacter rectalis	A546	86.9
SAGs from isolates
Escherichia coli CFT073	A594 A647	92.2 85.7
Escherichia coli EDL933	A546 A594 A647	67.9 64.6 97.4
SAGs from the bioreactor community
Methanoperedens nitroreducens	A594	26.8
Kuenenia stuttgartiensis	A594 A647	55.7 77.7
SURF-28 sp003599395	A647	111
Chazhemtobacterium aquaticus	A546	88.1
SAGs from human faecal samples
Prevotella copri	A546	64.8
Agathobacter rectalis strain 1	A647	64.7
Agathobacter rectalis strain 2	A546	88.4
Faecalibacterium prausnitzii	A546	65.4
Fusicateniacter saccharivorans	A647	156
Phascolarctobacterium_A succinatutens	A546	67.1
Phocaeicola vulgatus	A546	100.3
Negative control
DNA from calf thymus	A546 A594 A647	54.8 71.1 59.1
